# Supplementary material for: Single-step synthesis of copper sulfide hollow spheres by a template interface reaction routeElectronic supplementary information (ESI) available: XRD pattern of copper sulfide products. See http://www.rsc.org/suppdata/jm/b4/b407435a/
Source: Royal Society of Chemistry journal article supplement (doi:10.1039/b407435a), 2004-01-01
Supplement: b407435a.doc [file b407435a.doc]

**Supplementary** **data**

Single-step synthesis of copper sulfide hollow spheres by a template interface reaction route

Songming Wan, Fan Guo, Liang Shi, Yiya Peng, Xinzheng Liu, Yuanguang Zhang and Yitai Qian*

Department of Chemistry, University of Science and Technology of China, Hefei, Anhui 230026, China. Fax: 86 0551 3606176; E-mail: [smwan@ustc.edu.cn](mailto:smwan@ustc.edu.cn)

ESI 1. XRD patterns of the products obtained by the reaction of CuCl and sulfur with the molar ratio of CuCl: S = 0.01mol: 0.01mol in EG solvent at different temperatures.
